# Supplementary material for: Enhanced total flavonoid accumulation and alleviated growth inhibition of germinating soybeans by GABA under UV-B stress
Source: Royal Society of Chemistry journal article supplement (doi:10.1039/d2ra00523a), 2022-01-01
Supplement: d2ra00523a1.pdf [file d2ra00523a1.pdf]

### Supplement figure captions

**Fig. S1.** Effect of germination time on the isoflavone content of soybean sprouts. Each data point represents the average (average  $\pm$  SD) of three independent biological replicates. Lowercase letters reflect significant differences ( $P < 0.05$ ) in indicators between treatments at a given germination time using Tukey's test. 2: 2 days of age; 3: 3 days of age; 4: 4 days of age; 5: 5 days of age; 6: 6 days of age.

**Fig. S2.** Effect of UV radiation duration on growth condition (I), shoot length (II), fresh weight (III) and isoflavone content of soybean sprouts during germination. Each data point represents the average (average  $\pm$  SD) of three independent biological replicates. Lower-case letters reflect significant differences ( $P < 0.05$ ) in the indicators between treatments at a given germination time using Tukey's test. CK: control; 3: 3 h/d UV radiation; 6: 6 h/d UV radiation; 9: 9 h/d UV radiation; 12: 12 h/d UV radiation; 15: 15 h/d UV radiation.

**Fig. S3.** Effect of applied concentrations of GABA under UV radiation for 9 h/d on the growth status (I), shoot length (II), fresh weight (III) and isoflavone content of soybean shoots during germination. Each data point represents the average (average  $\pm$  SD) of three independent biological replicates. Lowercase letters reflect significant differences in indicators between treatments at a given germination time using Tukey's test ( $P < 0.05$ ). CK: control; 0.05: 0.05 mM GABA; 0.25: 0.25 mM GABA; 1: 1 mM GABA; 5: 5 mM GABA; 10: 10 mM GABA; 20: 20 mM GABA; 40: 40 mM GABA

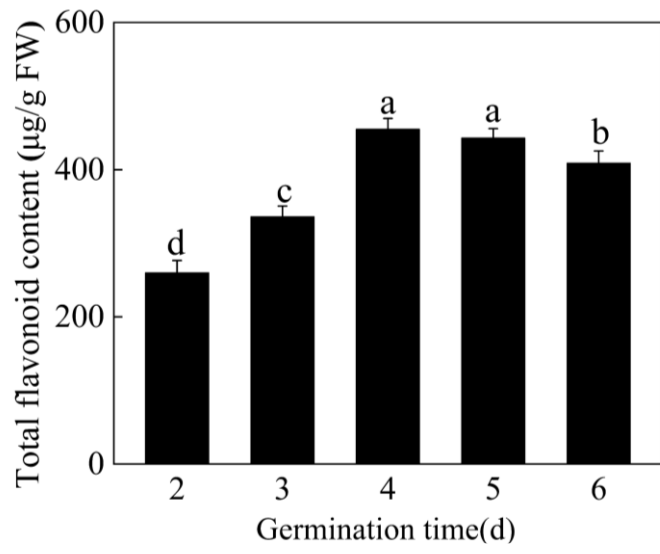

**Fig.S1**

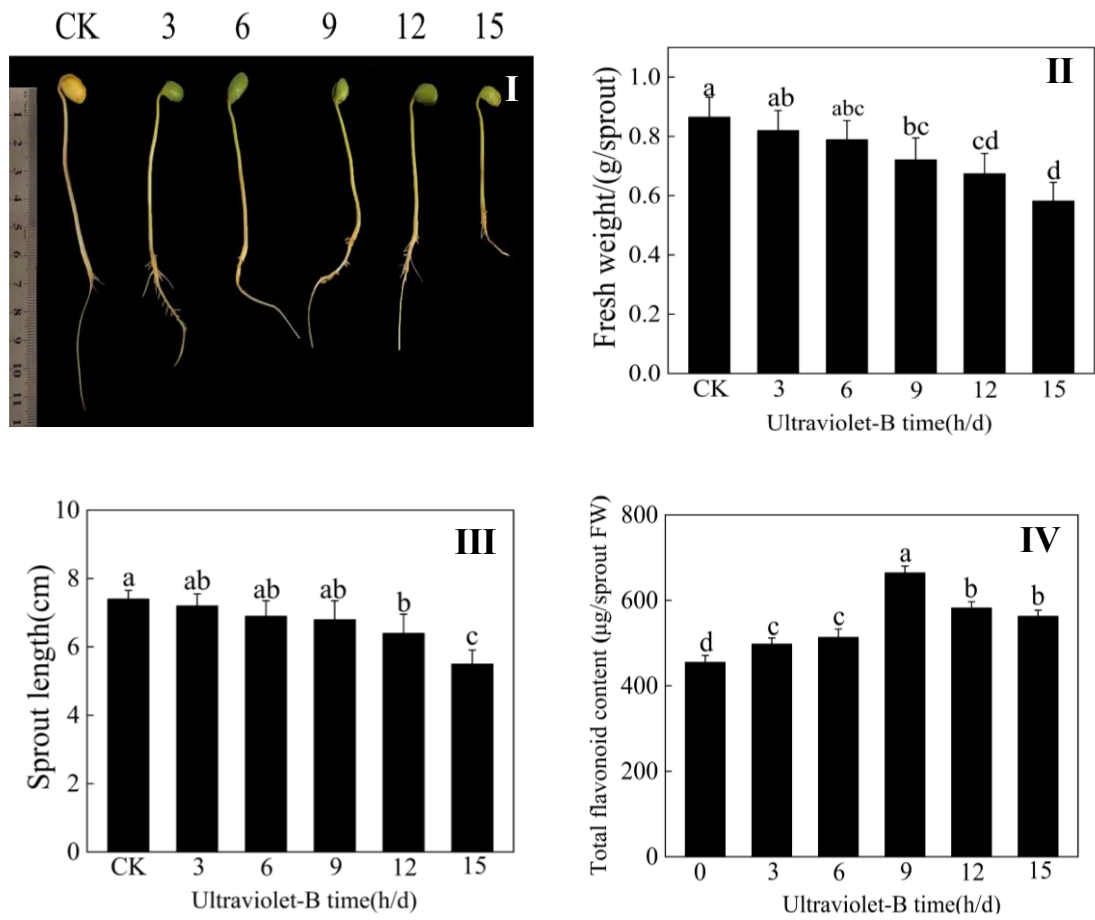

**Fig. S2**

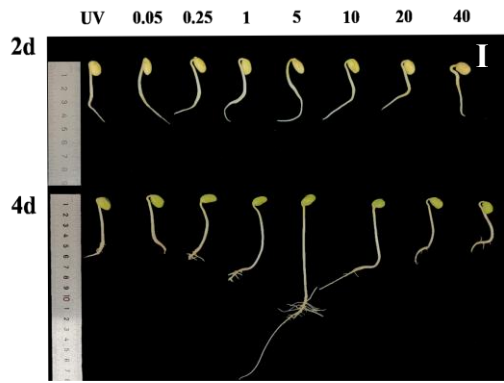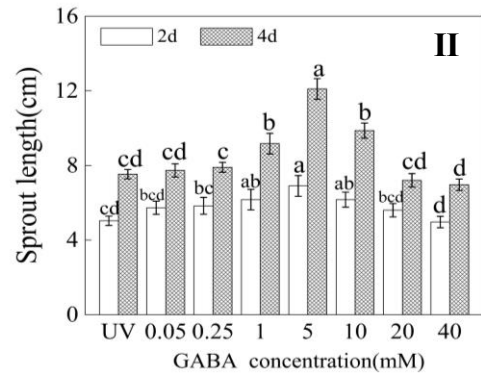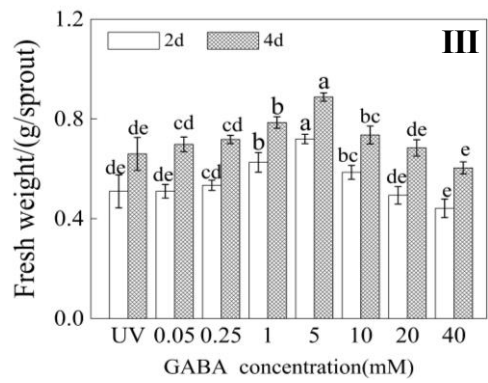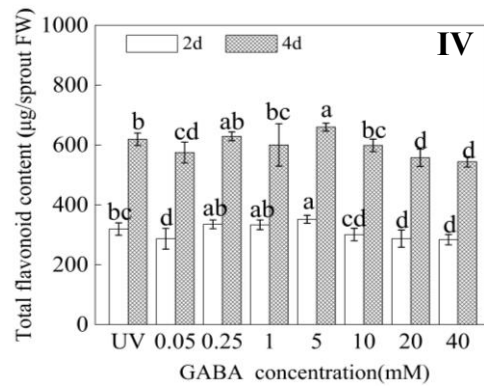

Fig. S3

**Supplement Table S1.** Specific primers used in the present study.

| Gene         | Gene name                     | Primer    | Primer sequences (5' - 3') |
|--------------|-------------------------------|-----------|----------------------------|
| <i>PAL1</i>  | Phenylalanine ammonia lyase 1 | Sense     | AGCAACACAACCAGGATGTCAA     |
|              |                               | Ant-sence | CAATTGCTTGGCAAAGTGCA       |
| <i>C4H</i>   | Cinnamic acid 4-hydroxylase   | Sense     | AGGCGAGATCAACGAAGACAAC     |
|              |                               | Ant-sence | G TTCACAAGCTCAGCAATGCC     |
| <i>4CL</i>   | 4-coumarate coenzyme A ligase | Sense     | AGGCAATGTACGTGGACAAGCT     |
|              |                               | Ant-sence | TCCGAGAGGACAGAGAAGTGGA     |
| <i>CHR</i>   | Chalcone reductase            | Sense     | CAAAGCCATTGGAGTCAGCAA      |
|              |                               | Ant-sence | CCATGCAAGGTTTCATCTCCACT    |
| <i>CHS</i>   | Chalcone synthase             | Sense     | GCTTGTTGTCTGTTCTGAG        |
|              |                               | Ant-sence | CACCTTCACTGTCTGGAG         |
| <i>IFR</i>   | Isoflavone reductase          | Sense     | AGATGGAAATGTGAAAGGAGCG     |
|              |                               | Ant-sence | TGTGCACGGCTTTGTTCAAG       |
| <i>CAT</i>   | Catalase                      | Sense     | ACTACAAATTCTGGTGCTCCTA     |
|              |                               | Ant-sence | TGCAAGCTTCTCCACAAGA        |
| <i>POD</i>   | Peroxidase                    | Sense     | GCTTTGAGCACCATTAGA         |
|              |                               | Ant-sence | TTGGTGAAGGGTC TAGTA        |
| <i>APX</i>   | Ascorbate peroxidase          | Sense     | ATCCTTGCTACGCACACACT       |
|              |                               | Ant-sence | TCCACATGCTTGGTCCACA        |
| <i>SOD</i>   | Superoxide dismutase          | Sense     | GCTTGTTGTCTGTTCTGAG        |
|              |                               | Ant-sence | GCTAACGGTACCATCATCA        |
| <i>Actin</i> | Reference gene                | Sense     | CTTCCCTCAGCACCTTCCAA       |
|              |                               | Ant-sence | GGTCCAGCTTTCACACTCCAT      |
